# Supplementary material for: MU2A—reconciling the genome and transcriptome to determine the effects of base substitutions
Source: PubMed Central journal article supplement — Bioinformatics. 2010 Dec 12;27(3):416–8. doi: 10.1093/bioinformatics/btq658 (PMC3031033; doi:10.1093/bioinformatics/btq658), 2010-12-12
Supplement: supp_btq658_COI_bioinf-2010-1171_r1.pdf [file supp_btq658_COI_bioinf-2010-1171_r1.pdf]

# Bioinformatics CONFLICT OF INTEREST FORM

Title: Vijay Garla, Yong Kong, Sebastian Szpakowski, Author(s): Michael Krauthammer  
Ms number: BIOINF-2010-1171.R1

**PLEASE NOTE:** As an integral part of the online submission process, Corresponding authors are required to confirm whether they or their co-authors have any conflicts of interest to declare, and to provide details of these. If the Corresponding author is unable to confirm this information on behalf of all co-authors, the authors in question are required to complete and fax this Conflict of Interest form to the Editorial Office at +44 (0)1865 355903. It is the Corresponding author's responsibility to ensure that all authors adhere to this policy.

**MANUSCRIPT AUTHORS:** If you have been asked to do so by the Corresponding author, please complete **Part I or II.** At the point of submission, *Bioinformatics* policy requires that each author reveal any financial interests or connections, direct or indirect, or other situations that might raise the question of bias in the work reported or the conclusions, implications, or opinions stated - including pertinent commercial or other sources of funding for the individual author(s) or for the associated department(s) or organization(s), personal relationships, or direct academic competition.

When considering whether you should declare a conflicting interest or connection please consider the conflict of interest test: Is there any arrangement that would embarrass you or any of your co-authors if it was to emerge after publication and you had not declared it?  
If the manuscript is published, this information will be communicated in a statement in the published paper.

I. There have been no involvements that might raise the question of bias in the work reported or in the conclusions, implications, or opinions stated.

Vijay Garla  
Printed name  
NOV 25, 2010  
Date  
Signature  
OR

**II. Conflict of interest statement.**  
Sample statement: I hold stock\* in [business name], the makers of [product], and am currently conducting research sponsored by this company. I am also a member of the speakers' bureau for [business name].  
\* Please provide details of stock where this reveals a pertinent conflict of interest.  
My statement is as follows:

Printed name  
Signature  
Date
